# Supplementary material for: Induction Effect and Underlying Mechanism of Scutellarin on Apoptosis of Human Colorectal Cancer SW480&nbsp;Cells and AOM/DSS&nbsp;Mouse
Source: Research Square preprint supplement (doi:10.21203/rs.3.rs-124431/v1), 2020-12-11
Supplement: Supplementary file 1 [file 123b0914487b601f0a2d1427.docx]

**Supplementary information**

Table 1 Primer sequences for qRT-PCR

| Gene name | Primer sequences | PCR product size (bp) |
| --- | --- | --- |
| β-actin-human | Forward: 5’-CATGAAGTGTGACGTGGACATC-3’ | 155 |
|  | Reverse: 5’-CAGGAGGAGCAATGATCTTGATC-3’ |  |
| β-actin-mouse | Forward: 5’-TAGGCACCAGGGTGTGATG -3’ | 151 |
|  | Reverse: 5’- GTGGTGCCAGATCTTCTCCA -3’ |  |
| Bax-human | Forward: 5’-ATGATTGCCGCCGTGGACA CAG -3’ | 142 |
|  | Reverse: 5’-ACAGGGCCTTGAGCACCAG TTTG -3’ |  |
| Bax-mouse | Forward: 5’-GAACAGATCATGAAGACAGCG -3’ | 162 |
|  | Reverse: 5’-CAGTTCATCTCCAATTCGCC -3’ |  |
| Bcl-2-human | Forward：5’-TGGGGTCATGTGTGTGGAG A-3’ | 139 |
|  | Reverse: 5’-TAACACAAGGGCATCCCAGC-3’ |  |
| Bcl-2-mouse | Forward：5’-CAGTTCATCTCCAATTCGCC -3’ | 444 |
|  | Reverse: 5’-CCCACCGAACTCAAAGAA -3’ |  |
| Caspase3-human | Forward:5’-GCGTGATGTTTCTAAAGAAGATCACAGC-3’ | 166 |
|  | Reverse:5’-GGGTTTTCCAGTTAGACTTCTACAACGA-3’ |  |
| Caspase3-mouse | Forward: 5’-TGTCATCTCGCTCTGGTAC -3’ | 201 |
|  | Reverse: 5’-AAATGACCCCTTCATCACCA-3’ |  |
| Caspase9-human | Forward: 5’-AGCAGAAAGACCATGGGTTTGAGG-3’ | 197 |
|  | Reverse: 5’-CCTCCAGGAAACAAAACCTGGGAA-3’ |  |
| Caspase9-mouse | Forward: 5’-GGCGGAGCTCATGATGTCTGTG-3’ | 269 |
|  | Reverse: 5’-TTCCGGTGTGGCATCTCCATCA-3’ |  |
